# Supplementary material
Source: PubMed Central journal article supplement (PMC4566160)
Supplement: NIHMS696787-supplement-supplemental.pdf [file NIHMS696787-supplement-supplemental.pdf]

Supplementary material for Debo R. J. et al. 2015. Molecular and cellular profiling of acute responses to total body radiation exposure in ovariectomized female cynomolgus macaques. International Journal of Radiation Biology. 91:510–518.

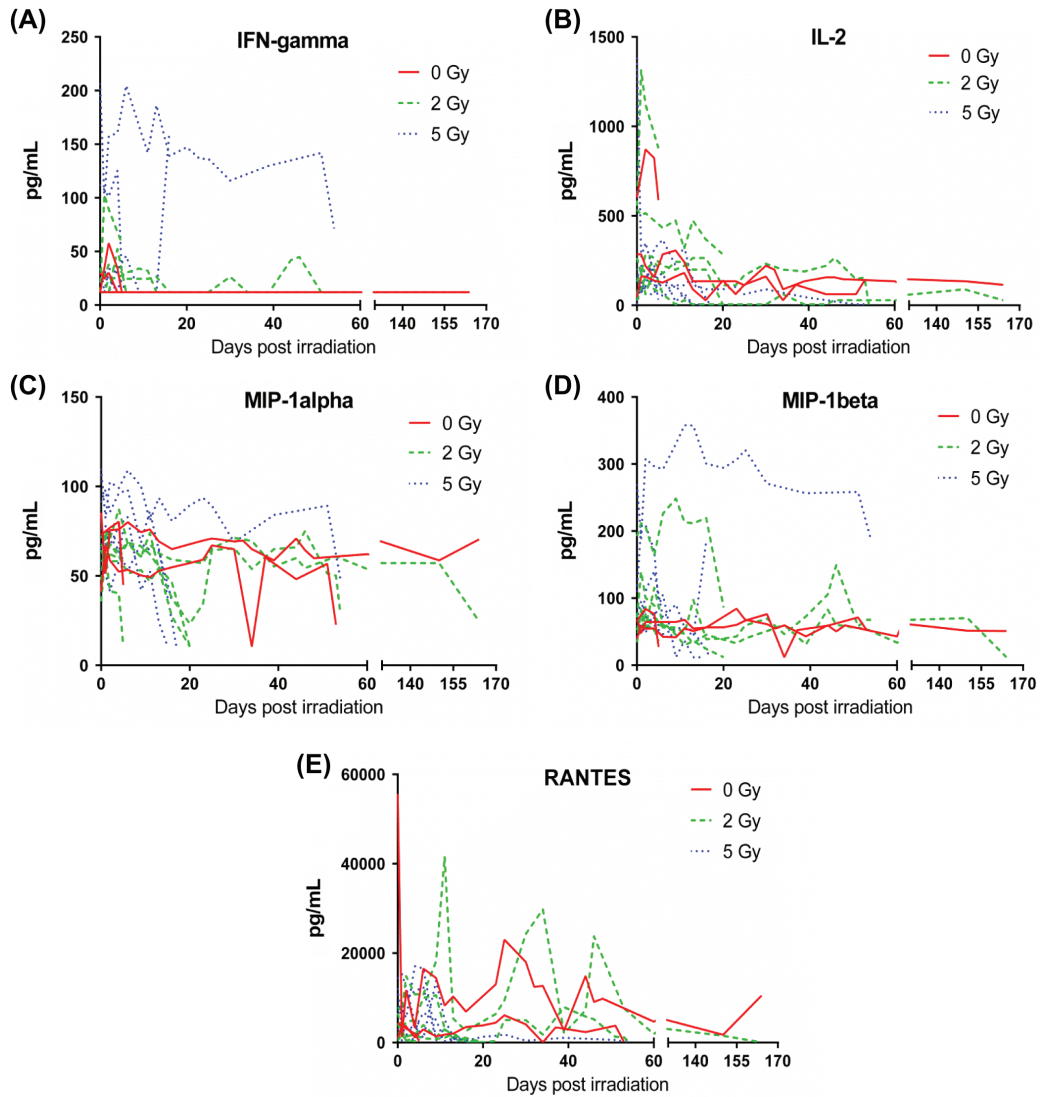

Supplementary Figure 1. Effects of 2 and 5 Gy TBI on plasma: (A) IFN- $\gamma$ , (B) IL-2, (C) MIP-1 $\alpha$ , (D) MIP-1 $\beta$ , and (E) RANTES. Single data points from individuals plotted across time.
